# Supplementary material for: A new family of two-dimensional ferroelastic semiconductors with negative Poisson's ratios
Source: Royal Society of Chemistry journal article supplement (doi:10.1039/c9nr10114d), 2020-01-01
Supplement: c9nr10114d1.pdf [file c9nr10114d1.pdf]

Electronic Supplementary Information for

**A new family of two-dimensional ferroelastic semiconductors with negative Poisson's ratio**

Jun-Hui Yuan,<sup>1,+</sup> Ge-Qi Mao,<sup>1,+</sup> Kan-Hao Xue,<sup>1,\*</sup> Jiafu Wang<sup>2,3</sup> and Xiang-Shui Miao<sup>1</sup>

<sup>1</sup>Wuhan National Laboratory for Optoelectronics, School of Optical and Electronic Information, Huazhong University of Science and Technology, Wuhan 430074, China

<sup>2</sup>School of Science, Wuhan University of Technology, Wuhan 430070, China

<sup>3</sup>Department of Computer Science, Erik Jonsson School of Engineering and Computer Science, University of Texas at Dallas, Richardson, TX 75080, USA

**\*Corresponding Author**, E-mail: [xkh@hust.edu.cn](mailto:xkh@hust.edu.cn) (K.-H. Xue)

<sup>+</sup>The authors J.-H. Yuan and G.-Q. Mao contributed equally to this work.

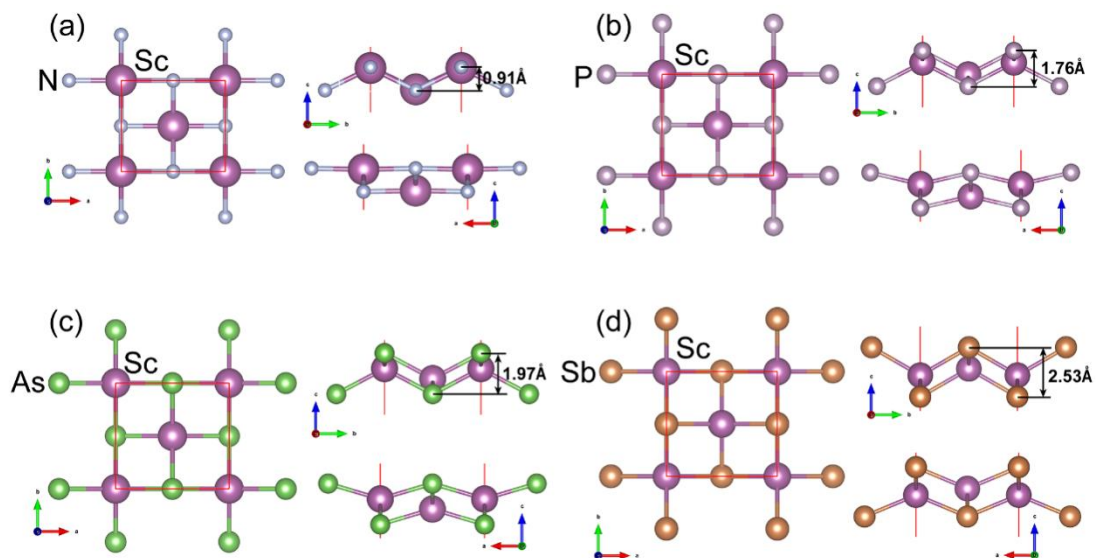

**Figure S1.** Optimized structures of  $ML ScB$  ( $B=N, P, As, Sb$ ).

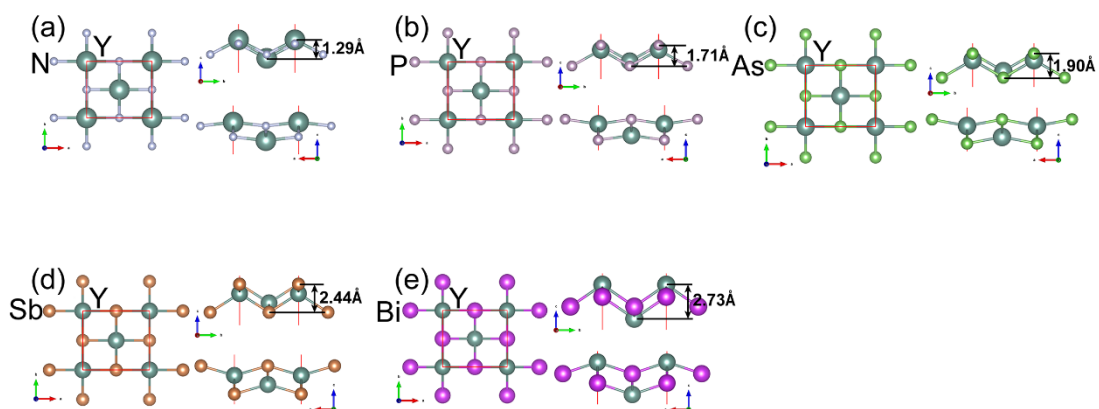

**Figure S2.** Optimized structures of  $ML YB$  ( $B=N, P, As, Sb, Bi$ ).

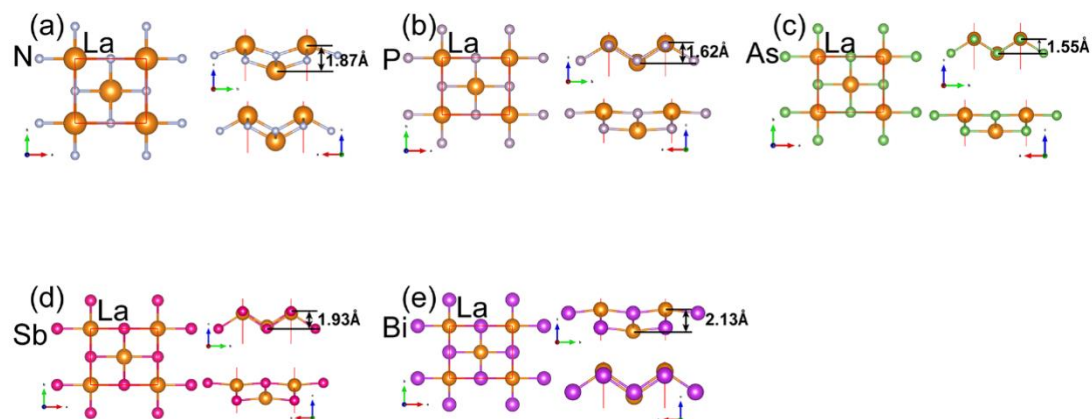

**Figure S3.** Optimized structures of  $ML LaB$  ( $B=N, P, As, Sb, Bi$ ).

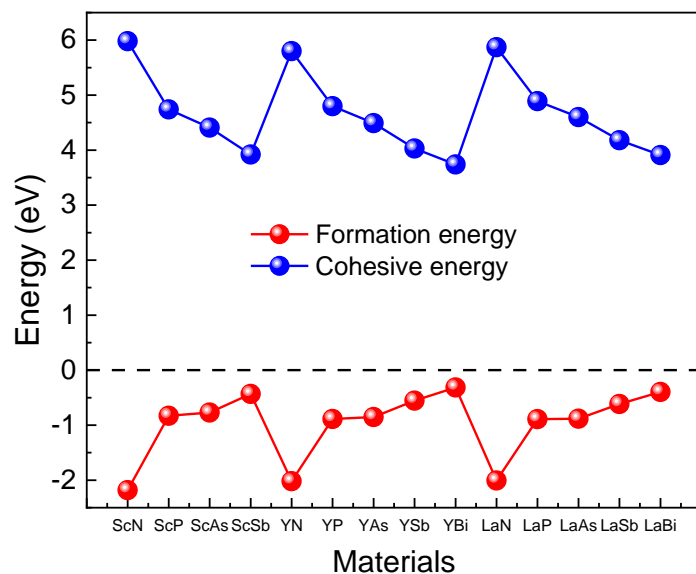

**Figure S4.** The calculated formation energies and cohesive energies of ML  $AB$  ( $A = \text{Sc}, \text{Y}, \text{La}; B = \text{N}, \text{P}, \text{As}, \text{Sb}, \text{Bi}$ ).

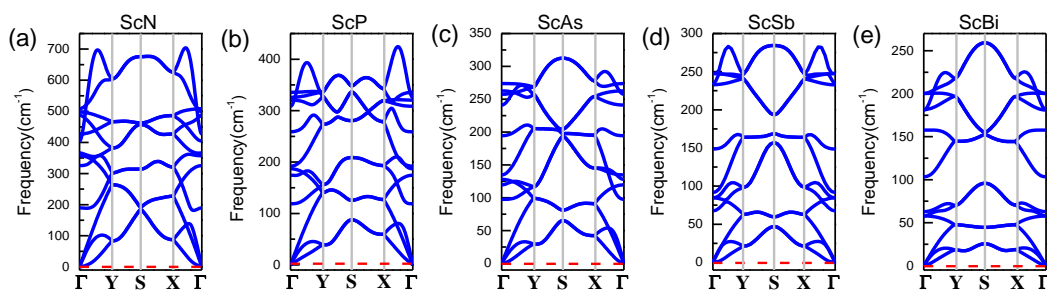

**Figure S5.** Calculated phonon spectra of ML  $\text{Sc}B$  ( $B = \text{N}, \text{P}, \text{As}, \text{Sb}$  and  $\text{Bi}$ ).

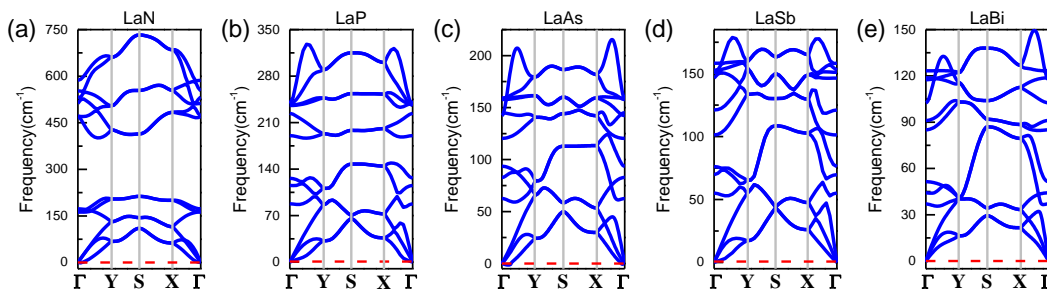

**Figure S6.** Calculated phonon spectra of ML  $\text{La}B$  ( $B = \text{N}, \text{P}, \text{As}, \text{Sb}$  and  $\text{Bi}$ ).

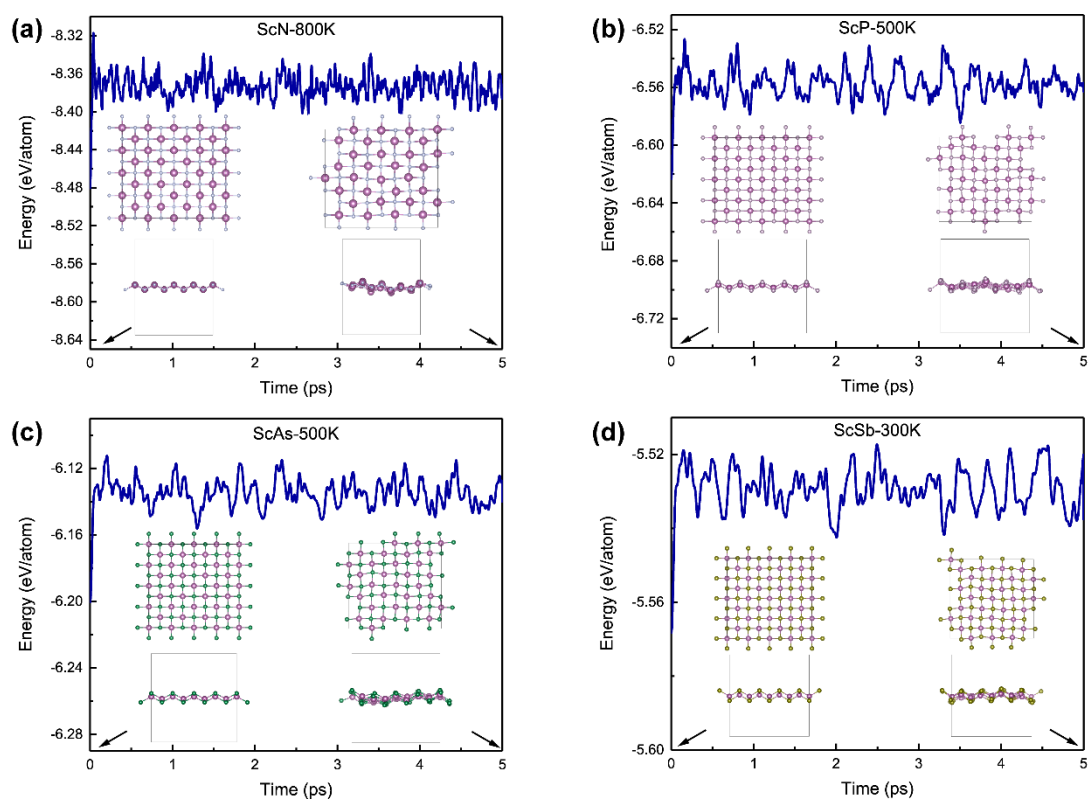

**Figure S7.** Total energy variations as well as the top view of the snapshots from the *ab initio* molecules dynamics simulation for ML ScB ( $B=N, P, As$  and  $Sb$ ).

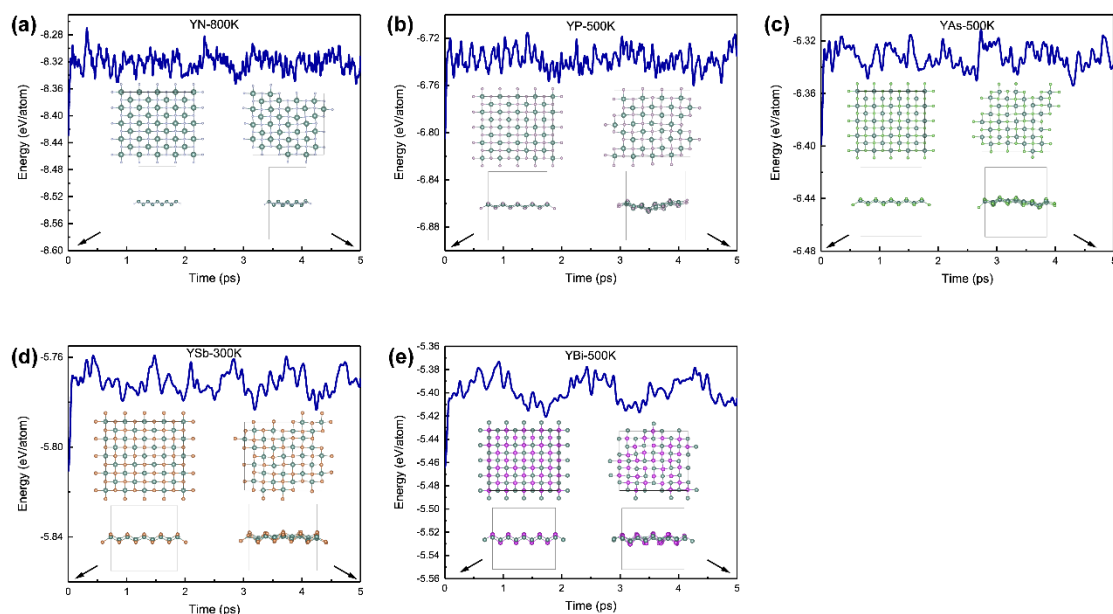

**Figure S8.** Total energy variations as well as the top view of the snapshots from the *ab initio* molecules dynamics simulation for ML YB ( $B=N, P, As, Sb$  and  $Bi$ ).

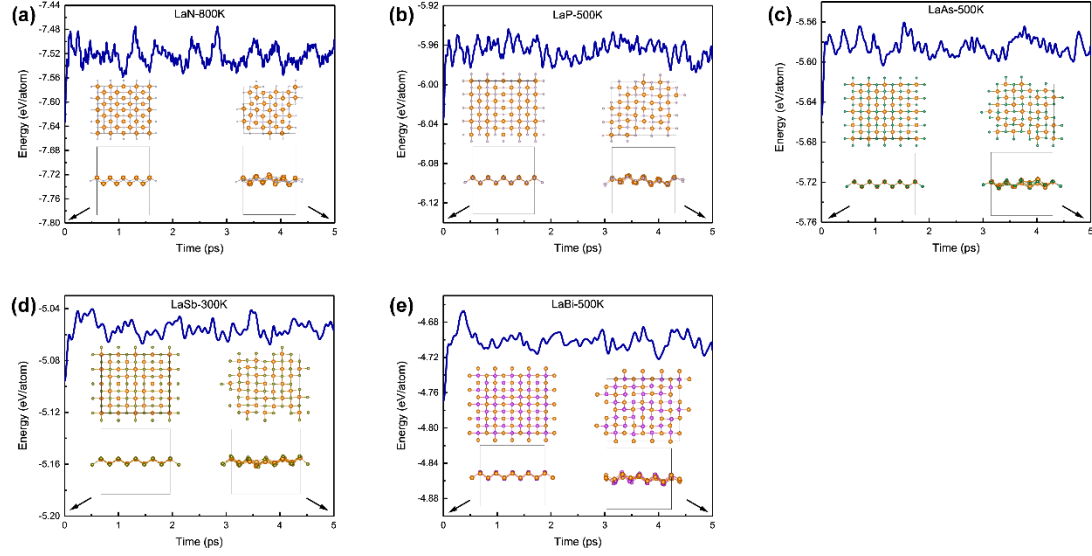

**Figure S9.** Total energy variations as well as the top view of the snapshots from the *ab initio* molecules dynamics simulation for ML LaB ( $B=N, P, As, Sb$  and  $Bi$ ).

**Table S1.** Calculated elastic constant of  $AB$  MLs. The mechanical stability is confirmed by the Born–Huang criteria, i.e.  $C_{11}C_{22} - C_{12}^2 > 0$ ,  $C_{66} > 0$ .

| Structure | $C_{11}$ | $C_{22}$ | $C_{12}$ | $C_{66} (>0)$ | $C_{11}C_{22} - C_{12}^2$ | Mechanical stability |
|-----------|----------|----------|----------|---------------|---------------------------|----------------------|
| ScN       | 158.15   | 40.03    | 7.93     | 8.38          | 6268.89                   | Yes                  |
| ScP       | 72.79    | 10.30    | 12.99    | 23.15         | 581.22                    | Yes                  |
| ScAs      | 49.41    | 8.84     | 14.14    | 20.20         | 237.04                    | Yes                  |
| ScSb      | 20.96    | 7.29     | 10.23    | 13.29         | 48.12                     | Yes                  |
| ScBi      | 9.39     | 8.88     | 10.80    | 12.14         | <b>-33.20</b>             | <b>No</b>            |
| YN        | 80.61    | 37.56    | 9.21     | 47.28         | 2943.23                   | Yes                  |
| YP        | 97.07    | 10.78    | 7.55     | 21.19         | 989.41                    | Yes                  |
| YAs       | 77.07    | 8.86     | 7.93     | 18.64         | 619.95                    | Yes                  |
| YSb       | 44.66    | 6.34     | 6.99     | 12.81         | 234.64                    | Yes                  |
| YBi       | 35.46    | 5.80     | 6.12     | 11.24         | 168.38                    | Yes                  |
| LaN       | 43.14    | 23.96    | 18.63    | 37.17         | 686.47                    | Yes                  |
| LaP       | 64.48    | 11.53    | 3.17     | 14.22         | 733.70                    | Yes                  |
| LaAs      | 75.50    | 9.53     | 1.43     | 12.40         | 717.35                    | Yes                  |
| LaSb      | 76.99    | 5.69     | 1.40     | 8.42          | 436.03                    | Yes                  |
| LaBi      | 69.54    | 221.45   | 66.57    | 7.38          | 10968.82                  | Yes                  |

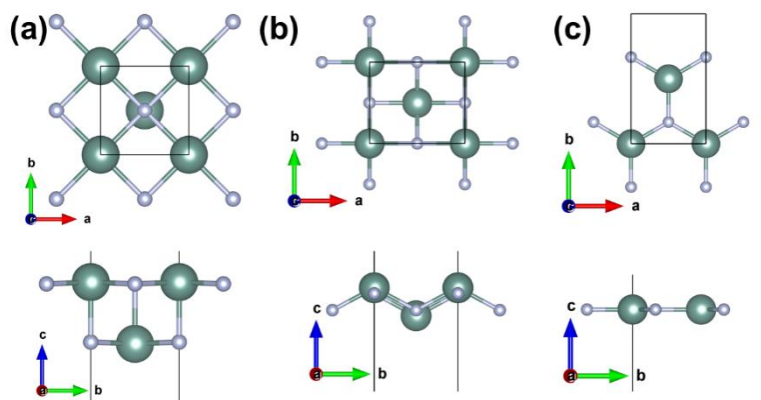

**Figure S10.** Optimized crystal structures of (a) YN (100), (b) YN (110) in this work and (c) YN (111).

**Table S2.** The cohesive energies of  $MLYB$  ( $B = N, P, As, Sb$  and  $Bi$ ) with three different 2D structures taken from the *fcc* bulk, over the (100), (110) and (111) planes. The corresponding optimized structures are shown in **Figure R10**.

| Cohesive energy (eV) |       |       |       |
|----------------------|-------|-------|-------|
| Structure            | 100   | 110   | 111   |
| YN                   | 6.146 | 5.787 | 5.544 |
| YP                   | 5.200 | 4.796 | 4.331 |
| YAs                  | 4.866 | 4.484 | 4.009 |
| YSb                  | 4.374 | 4.029 | 3.516 |
| YBi                  | 4.057 | 3.737 | 3.221 |

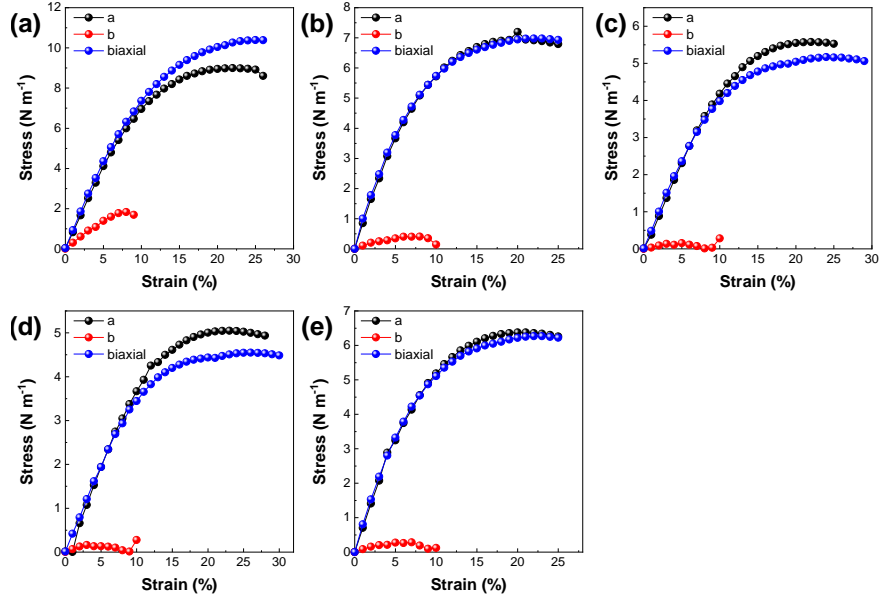

**Figure S11.** The strain-stress relations of ML YB ( $B = \text{N, P, As, Sb}$  and  $\text{Bi}$ ) under uniaxial  $a$ ,  $b$  and biaxial tension. (a) YN; (b) YP; (c) YAs; (d) YSb and (e) YBi.

**Table S3.** Summary of the ideal tensile strengths and critical strains of ML YB under three strain paths.

| Structures | Direction | Ideal tensile strength ( $\text{N m}^{-1}$ ) | Critical strain ( $\epsilon$ ) |
|------------|-----------|----------------------------------------------|--------------------------------|
| YN         | a         | 8.99                                         | 0.22                           |
|            | b         | 1.83                                         | 0.08                           |
|            | biaxial   | 10.39                                        | 0.25                           |
| YP         | a         | 7.19                                         | 0.20                           |
|            | b         | 0.41                                         | 0.08                           |
|            | biaxial   | 6.98                                         | 0.22                           |
| YAs        | a         | 6.38                                         | 0.20                           |
|            | b         | 0.28                                         | 0.07                           |
|            | biaxial   | 6.27                                         | 0.23                           |
| YSb        | a         | 5.58                                         | 0.22                           |
|            | b         | 0.15                                         | 0.05                           |
|            | biaxial   | 5.17                                         | 0.24                           |
| YBi        | a         | 5.05                                         | 0.23                           |
|            | b         | 0.16                                         | 0.03                           |
|            | biaxial   | 4.55                                         | 0.26                           |

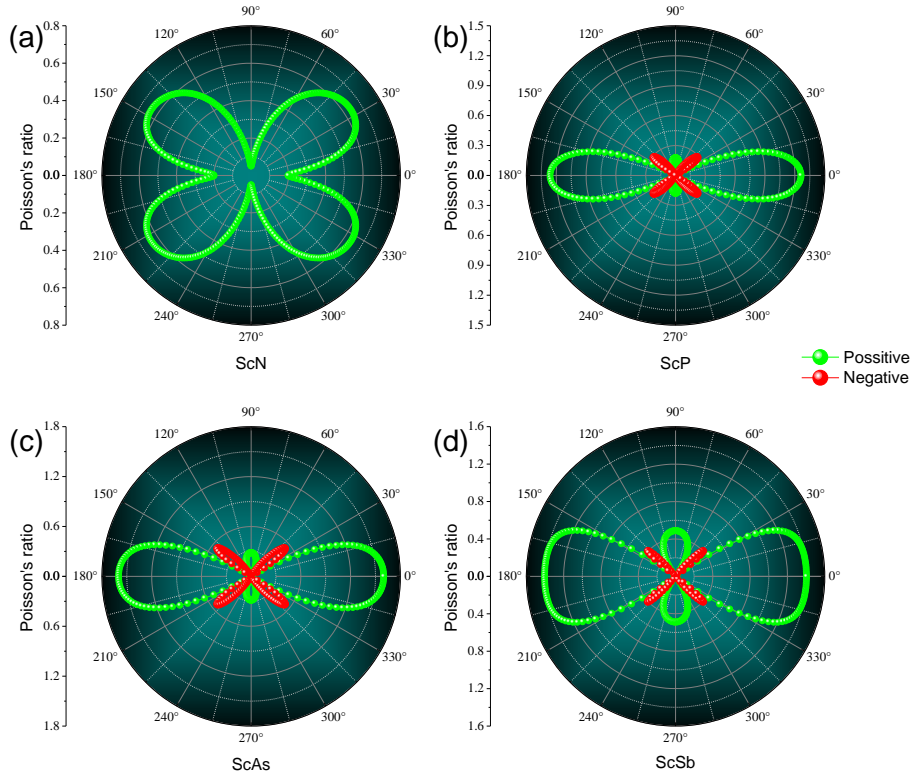

**Figure S12.** (a) Poisson's ratio of ML ScB ( $B=N, P, As, Sb$ ) as a function of the angle  $\theta$ , where  $\theta = 0^\circ$  corresponds to the  $a$ -axis. Negative Poisson's ratio is specially marked with red balls.

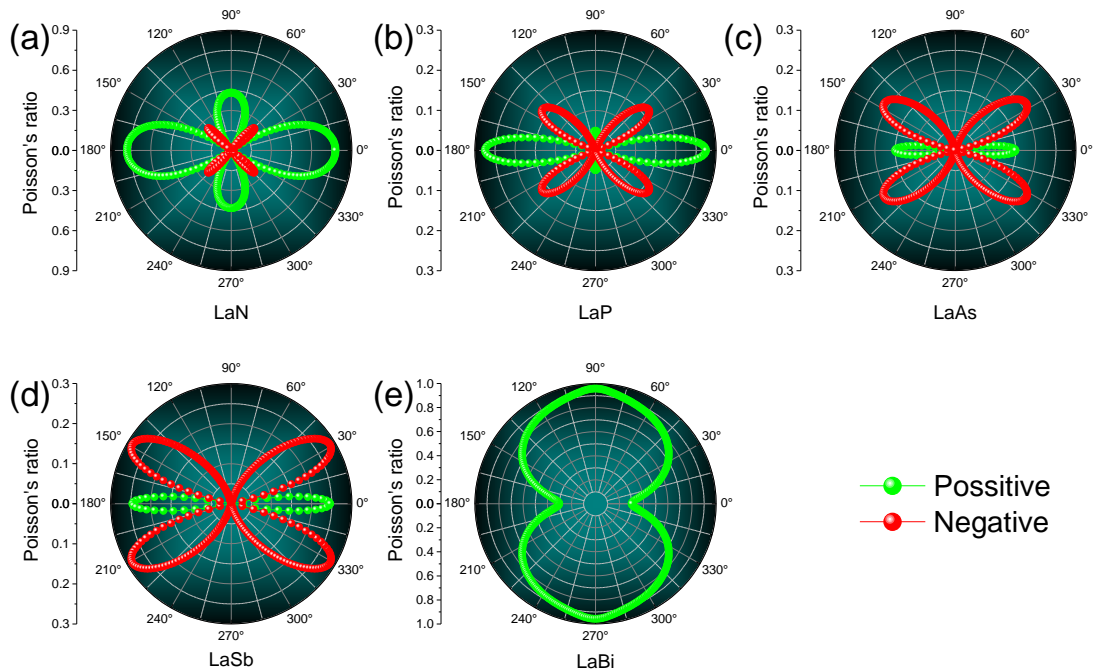

**Figure S13.** (a) Poisson's ratio of ML LaB ( $B=N, P, As, Sb, BI$ ) as a function of the angle  $\theta$ , where  $\theta = 0^\circ$  corresponds to the  $a$ -axis. Negative Poisson's ratio is specially marked with red balls.



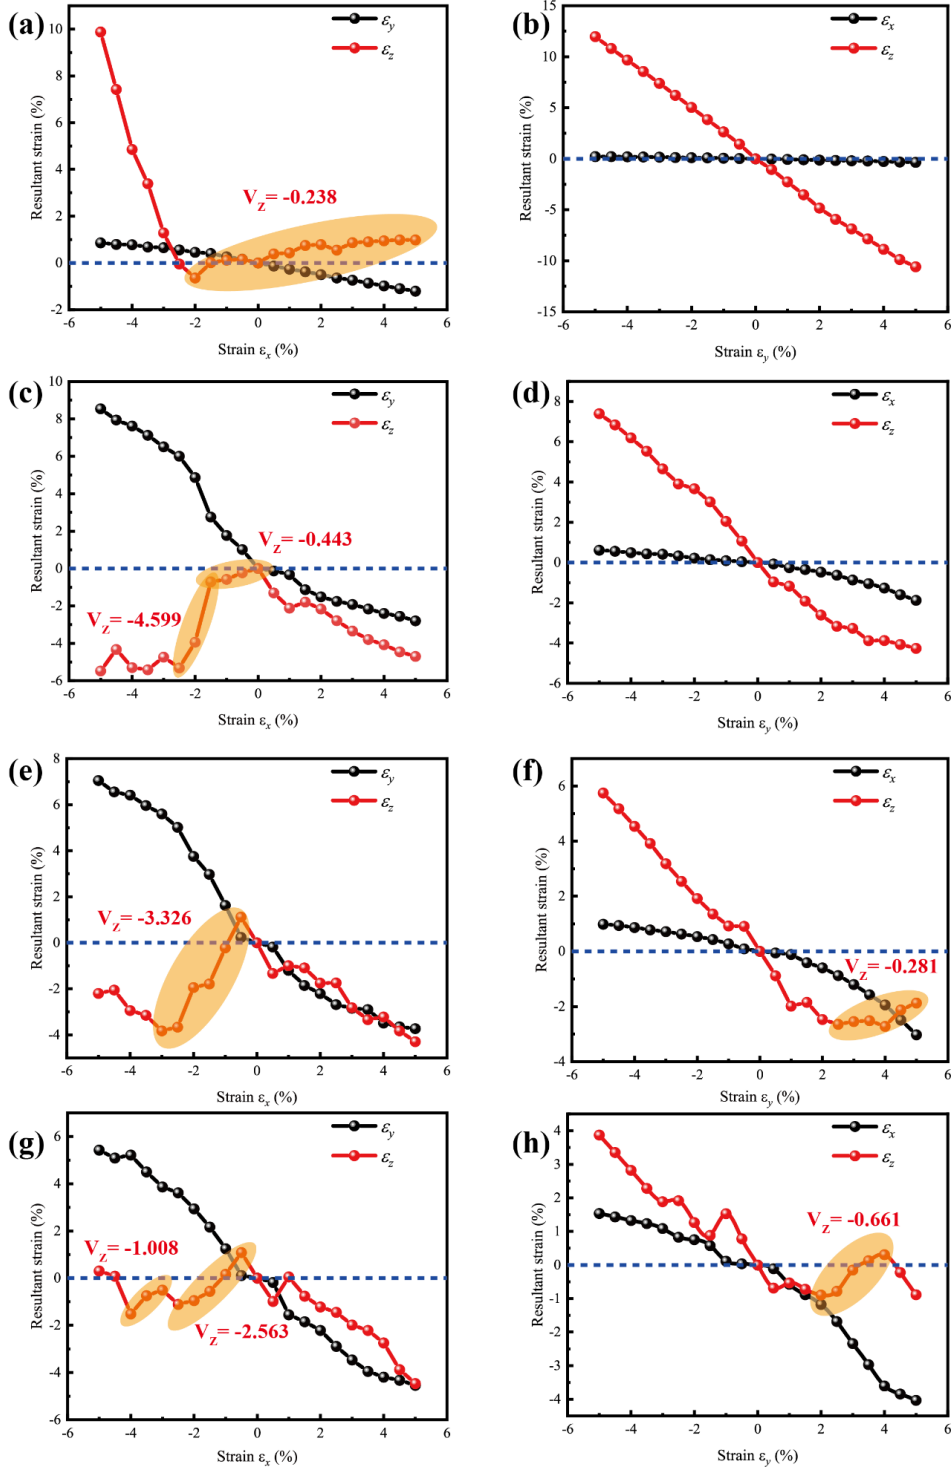

**Figure S14.** The  $z$ -axis mechanical responses of ML  $AB$  under uniaxial strains. (a) ScN under uniaxial strain along the  $a$ -direction; (b) ScN under uniaxial strain along the  $b$ -direction; (c) ScP under uniaxial strain along the  $a$ -direction; (d) ScP under uniaxial strain along the  $b$ -direction; (e) ScAs under uniaxial strain along the  $a$ -direction; (f) ScAs under uniaxial strain along the  $b$ -direction; (g) ScSb under uniaxial strain along the  $a$ -direction; (h) ScSb under uniaxial strain along the  $b$ -direction.

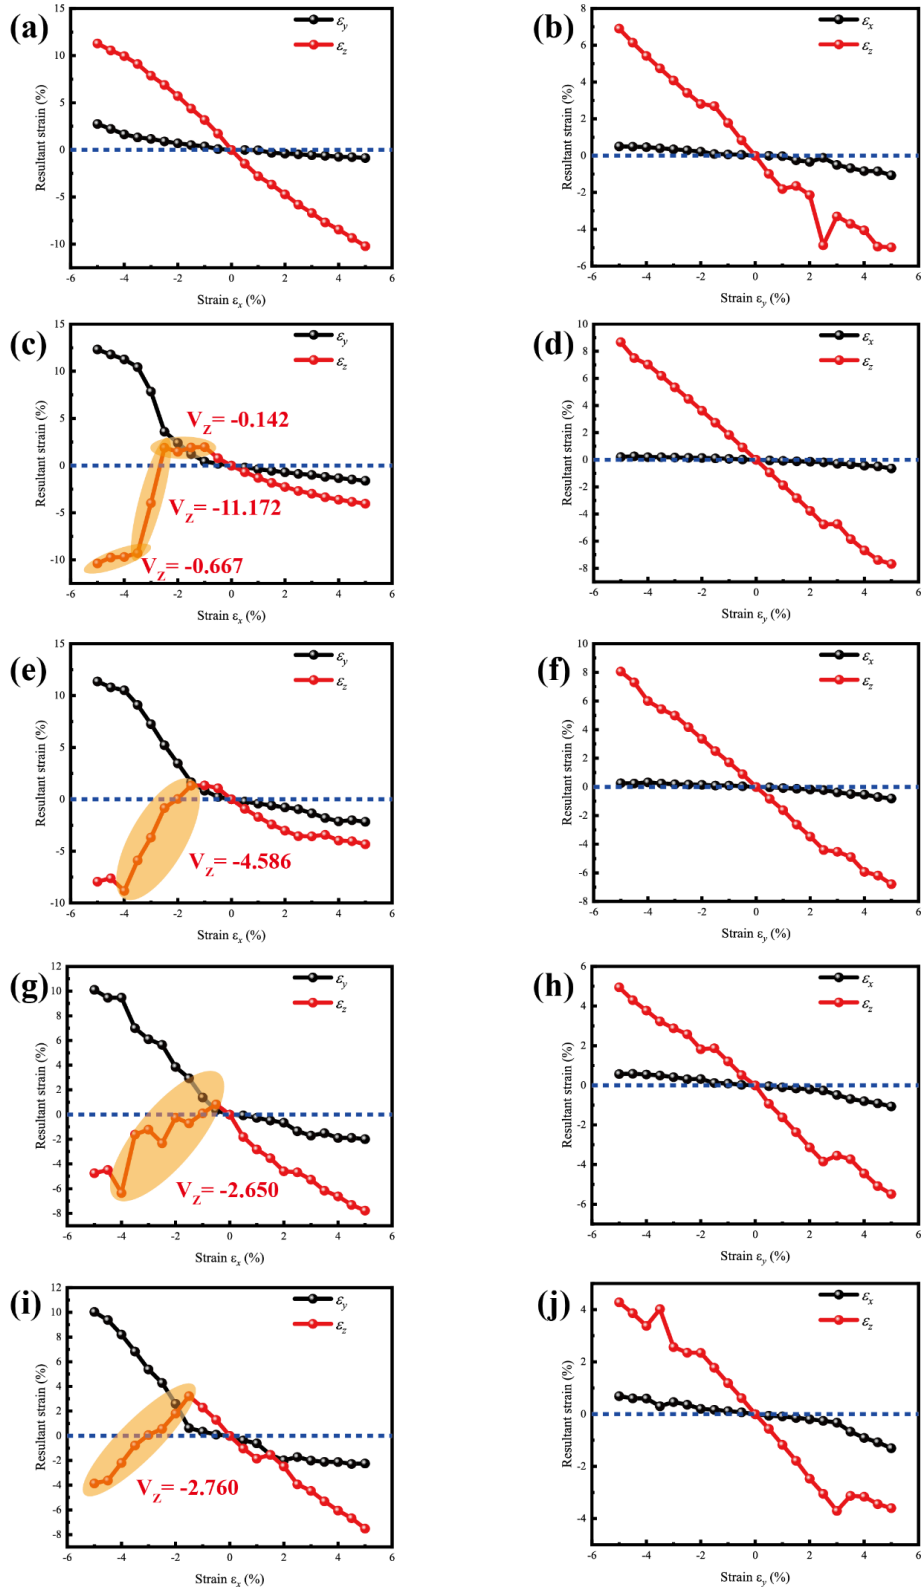

**Figure S15.** The  $z$ -axis mechanical responses of ML  $AB$  under uniaxial strains. (a) YN under uniaxial strain along the  $a$ -direction; (b) YN under uniaxial strain along the  $b$ -direction; (c) YP under uniaxial strain along the  $a$ -direction; (d) YP under uniaxial strain along the  $b$ -direction; (e) YAs under uniaxial strain along the  $a$ -direction; (f) YAs under

uniaxial strain along the  $b$ -direction; (g) YSb under uniaxial strain along the  $a$ -direction; (h) YSb under uniaxial strain along the  $b$ -direction. (i) YBi under uniaxial strain along the  $a$ -direction; (j) YBi under uniaxial strain along the  $b$ -direction.

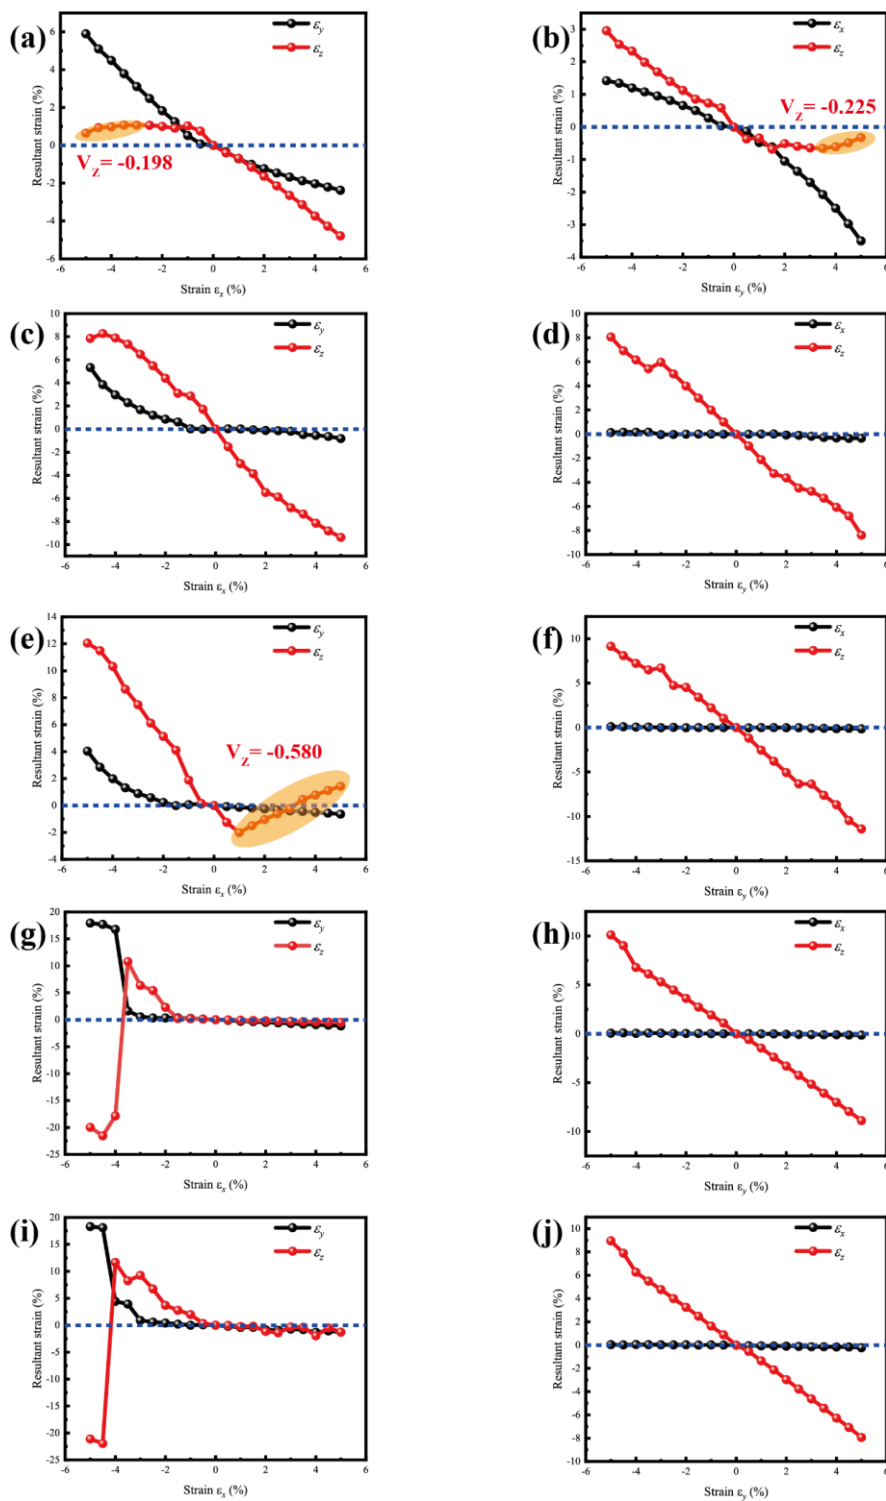

**Figure S16.** The  $z$ -axis mechanical responses of ML  $AB$  under uniaxial strains. (a) LaN under uniaxial strain along the  $a$ -direction; (b) LaN under uniaxial strain along the  $b$ -

direction; (c) LaP under uniaxial strain along the  $a$ -direction; (d) LaP under uniaxial strain along the  $b$ -direction; (e) LaAs under uniaxial strain along the  $a$ -direction; (f) LaAs under uniaxial strain along the  $b$ -direction; (g) LaSb under uniaxial strain along the  $a$ -direction; (h) LaSb under uniaxial strain along the  $b$ -direction. (i) LaBi under uniaxial strain along the  $a$ -direction; (j) LaBi under uniaxial strain along the  $b$ -direction. For (g) and (i), there is a positive slope at the red line on the left (from -4.5% to -3.5%), which was not subject to fitting because the material has undergone a phase transition.

### **Out-of-plane NPR calculations:**

The strain is defined as  $\varepsilon = (l - l_0)/l_0$ , where  $\varepsilon$  involves  $\varepsilon_x$ ,  $\varepsilon_y$ , and  $\varepsilon_z$ , which correspond to the relative strains along the  $a$ -,  $b$ -, and  $c$ -directions, respectively;  $l = a, b$  represent the lattice parameters along the  $a$ - and  $b$ -directions under strain, while  $l = h$  represents the buckling height (or thickness) of ML  $AB$  under strain;  $l_0 = a_0, b_0, h_0$  are the corresponding lattice constants and buckling heights of ML  $AB$  without strain, respectively. In the calculations, a step size of 0.05% was used in order to get more accurate results. Upon fitting  $y = -v_1x + v_2x^2 + v_3x^3$ , where  $y$  and  $x$  indicate applied strain and resultant strain,  $v_1$  is the obtained Poisson's ratio.<sup>1</sup> In the meantime, piecewise fitting was used to get a more reasonable result. In sum, 10 of the 14 systems exhibit out-of-plane NPR, except LaP, LaSb, LaBi and YN.

**Table S4.** The energy barrier  $E_b$  (meV per atom), reversible strain (%) of selected 2D ferroelastic materials. Spontaneous lattice strain  $\eta_y$ , initial lattice parameter  $a$  (Å),  $b$  (Å) and intermediate lattice parameters  $a'/b'$  (Å) are also listed.

| Material | $a$   | $b$   | $a'=b'$ | $\eta_y$              | $E_b$ | Strain |
|----------|-------|-------|---------|-----------------------|-------|--------|
| ScN      | 4.313 | 3.761 | 4.182   | [0.032, 0; 0, -0.096] | 43.39 | 14.67% |
| ScP      | 4.997 | 4.539 | 4.837   | [0.034, 0; 0, -0.060] | 2.53  | 10.80% |
| ScAs     | 5.077 | 4.687 | 4.930   | [0.030, 0; 0, -0.048] | 1.38  | 8.32%  |
| ScSb     | 5.262 | 4.967 | 5.126   | [0.027, 0; 0, -0.031] | 0.28  | 5.94%  |
| YN       | 4.618 | 3.982 | 4.349   | [0.064, 0; 0, -0.081] | 32.47 | 15.97% |
| YP       | 5.442 | 4.750 | 5.248   | [0.038, 0; 0, -0.090] | 48.58 | 14.59% |
| YAs      | 5.557 | 4.874 | 5.352   | [0.039, 0; 0, -0.085] | 8.62  | 14.01% |
| YSb      | 5.813 | 5.126 | 5.580   | [0.043, 0; 0, -0.078] | 3.95  | 13.40% |
| YBi      | 5.865 | 5.145 | 5.607   | [0.047, 0; 0, -0.079] | 5.15  | 14.01% |
| LaN      | 4.616 | 4.161 | 4.404   | [0.049, 0; 0, -0.054] | 3.15  | 10.94% |
| LaP      | 5.796 | 4.858 | 5.508   | [0.054, 0; 0, -0.111] | 32.85 | 19.31% |
| LaAs     | 5.978 | 4.993 | 5.726   | [0.045, 0; 0, -0.120] | 41.35 | 19.74% |
| LaSb     | 6.350 | 5.316 | 6.135   | [0.036, 0; 0, -0.125] | 24.76 | 19.46% |
| LaBi     | 6.449 | 5.332 | 6.223   | [0.037, 0; 0, -0.133] | 21.08 | 20.30% |

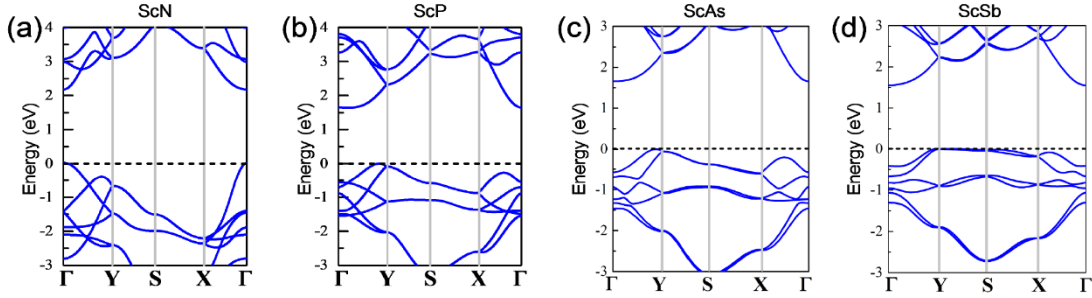

**Figure S17.** Electronic band structures of ScB ( $B=N, P, As$  and  $Sb$ ) obtained from HSE06 hybrid functional calculations. For ScAs and ScSb, spin-orbit coupling has been considered in the hybrid functional calculations.

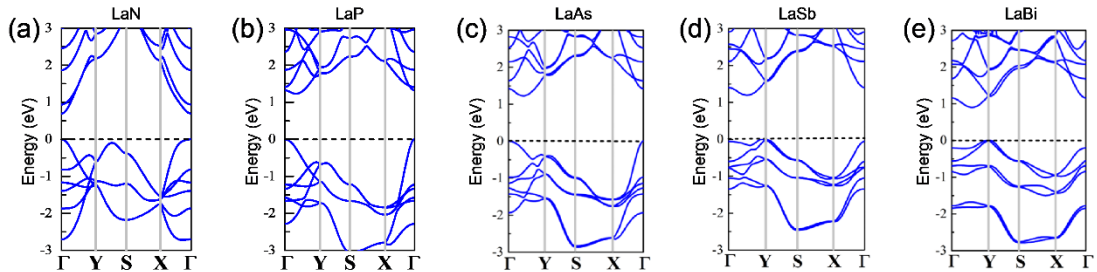

**Figure S18.** Electronic band structures of LaB ( $B=N, P, As, Sb$  and  $Bi$ ) obtained from HSE06 hybrid functional calculations. For LaAs, LaSb and LaBi, spin-orbit coupling has been considered in the hybrid functional calculations.

**Table S5.** Calculated band gaps at the HSE06, HSE06+SOC and GGA+U levels (eV). For the GGA+U calculations,  $U=3$  eV for Sc-3d,<sup>2</sup>  $U=4$  eV for Y-4d and  $U=5.4$  eV for La-5d<sup>3</sup> were used for on-site Hubbard corrections.

|      | GGA-PBE | HSE06 | HSE06+SOC | GGA+U |
|------|---------|-------|-----------|-------|
| ScN  | 1.30    | 2.15  | --        | 1.34  |
| ScP  | 0.91    | 1.64  | --        | 1.12  |
| ScAs | 0.93    | 1.66  | 1.65(7)   | 1.12  |
| ScSb | 0.84    | 1.57  | 1.55      | 1.01  |
| YN   | 0.004   | 0.75  | --        | 0.004 |
| YP   | 1.01    | 1.67  | --        | 1.23  |
| YAs  | 1.02    | 1.66  | 1.65      | 1.21  |
| YSb  | 0.94    | 1.57  | 1.54      | 1.09  |
| YBi  | 0.98    | 1.58  | 1.36      | 1.28  |
| LaN  | 0.29    | 0.69  | --        |       |
| LaP  | 0.82    | 1.23  | --        | 1.06  |
| LaAs | 0.82    | 1.23  | 1.22      | 1.18  |
| LaSb | 0.80    | 1.23  | 1.18      | 1.27  |
| LaBi | 0.76    | 1.14  | 1.00      | 1.25  |

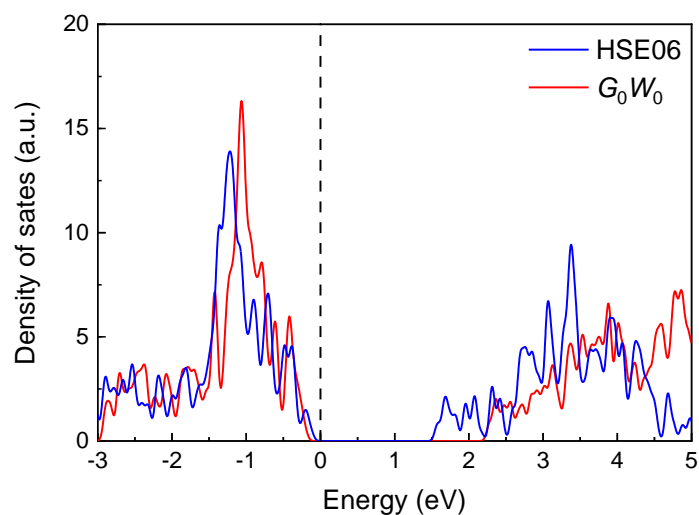

**Figure S19.** Density of states of ML YP at the HSE06 and  $G_0W_0$  levels.

**Table S6.** Calculated band gaps of bulk and ML *AB* using HSE06 or HSE06+SOC.

| Bulk/ML materials | Band gap (eV) (bulk) | Band gap (eV) (ML) |
|-------------------|----------------------|--------------------|
| ScN               | 0.92                 | 2.15               |
| ScP               | 0                    | 1.64               |
| ScAs              | 0                    | 1.65(7)            |
| ScSb              | 0                    | 1.55               |
| YN                | 1.12                 | 0.75               |
| YP                | 0                    | 1.67               |
| YAs               | 0                    | 1.65               |
| YSb               | 0                    | 1.54               |
| YBi               | 0                    | 1.36               |
| LaN               | 0.84                 | 0.69               |
| LaP               | 0.13                 | 1.23               |
| LaAs              | 0                    | 1.22               |
| LaSb              | 0                    | 1.18               |
| LaBi              | 0                    | 1.00               |

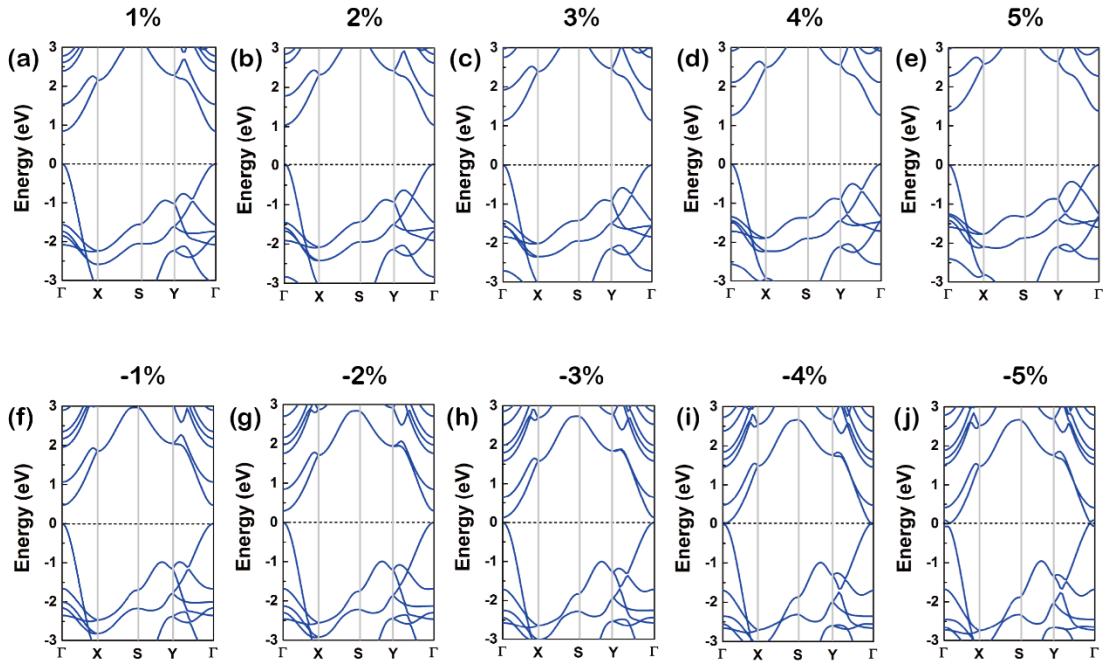**Figure S20.** Electronic band structures of YN obtained from HSE06 hybrid functional calculations under biaxial strains from -5% to 5%.

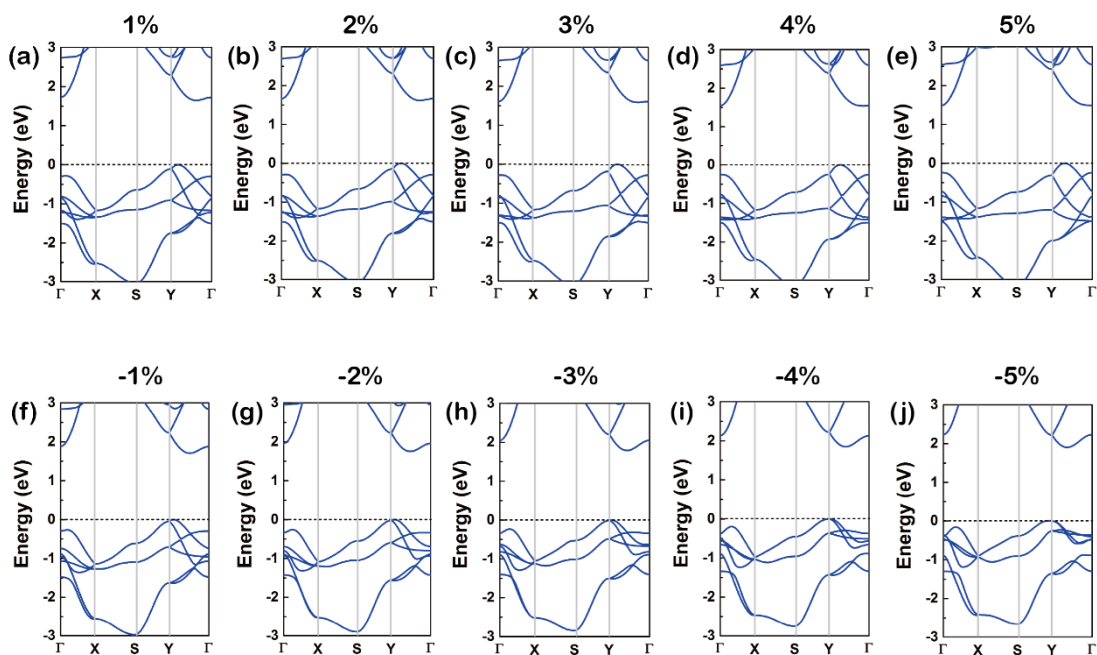

**Figure S21.** Electronic band structures of YP obtained from HSE06 hybrid functional calculations under biaxial strains from -5% to 5%.

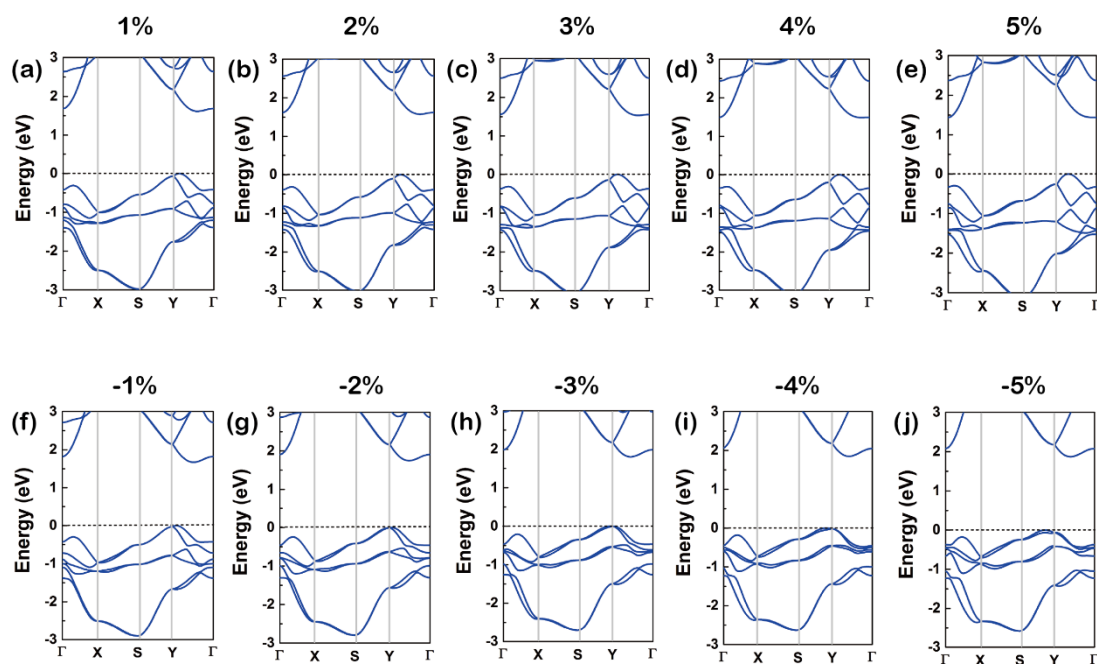

**Figure S22.** Electronic band structures of YAs obtained from HSE06 hybrid functional calculations under biaxial strains from -5% to 5%. In the calculations, the spin-orbit coupling effect has also been considered.



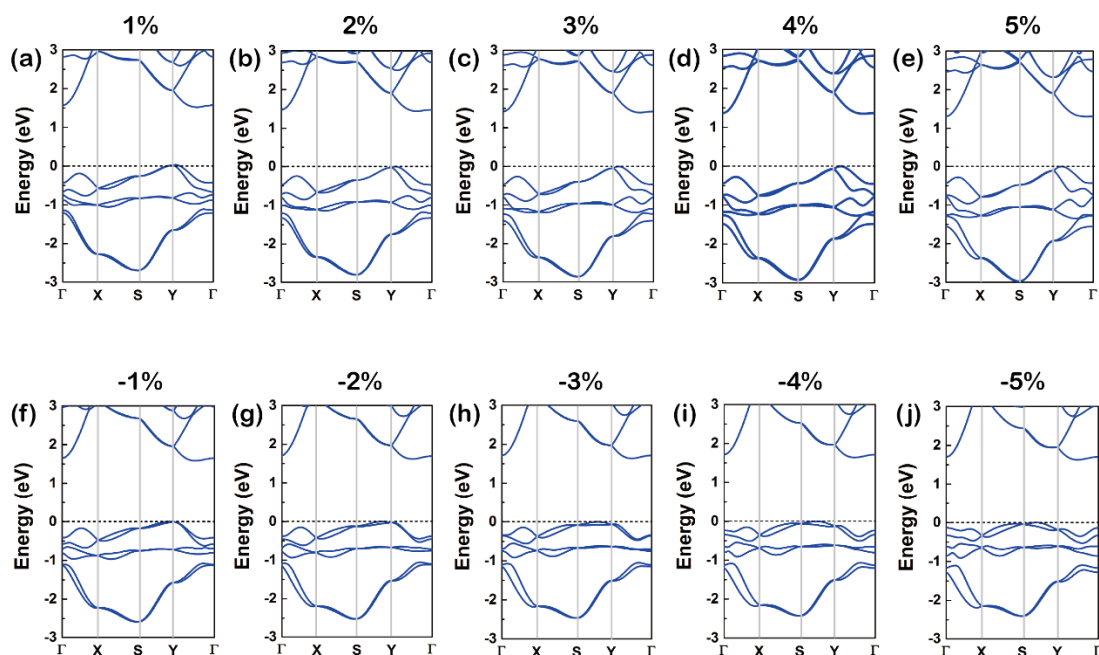

**Figure S23.** Electronic band structures of YSb obtained from HSE06 hybrid functional calculations under biaxial strains from -5% to 5%. In the calculations, the spin-orbit coupling effect has also been considered.

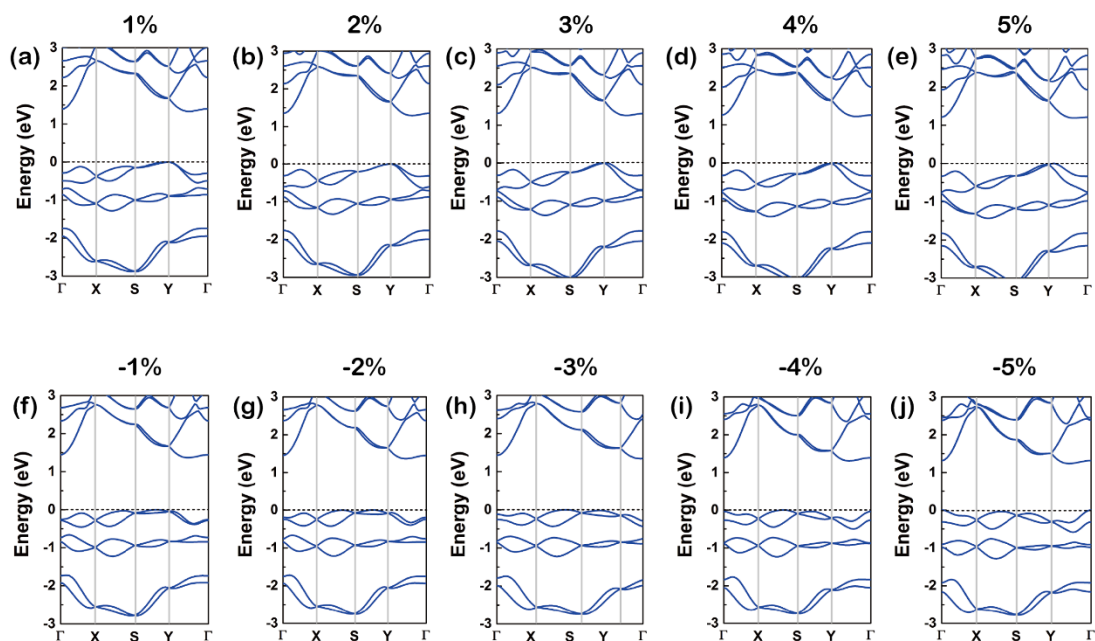

**Figure S24.** Electronic band structures of YBi obtained from HSE06 hybrid functional calculations under biaxial strains from -5% to 5%. In the calculations, the spin-orbit coupling effect has also been considered.

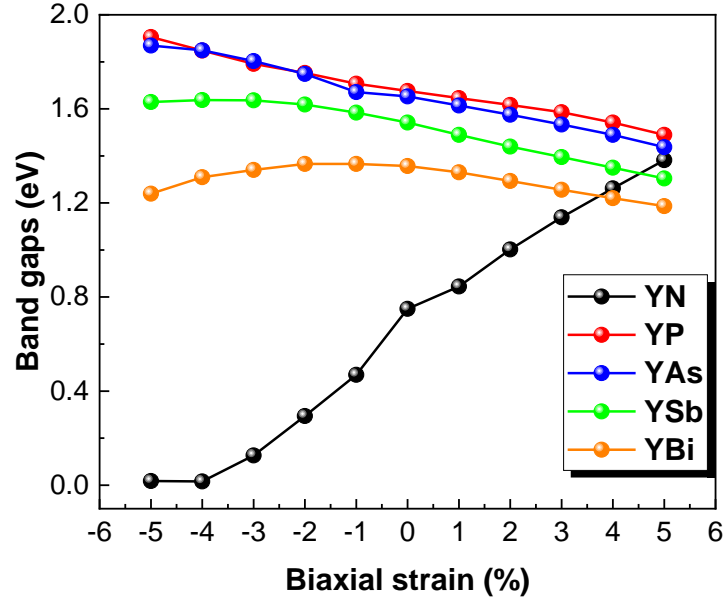

**Figure S25.** The corresponding electronic band gaps of  $YB$  ( $B = N, P, As, Sb, Bi$ ) obtained from HSE06 hybrid functional calculations under biaxial strains from -5% to 5%.

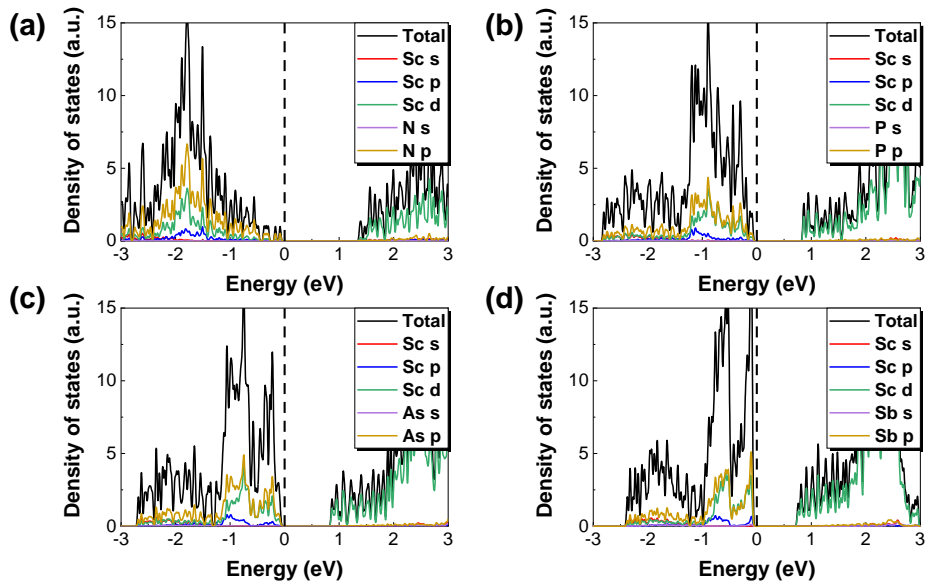

**Figure S26.** Projected density of states of ML ScB. (a) ScN; (b) ScP; (c) ScAs; (d) ScSb.

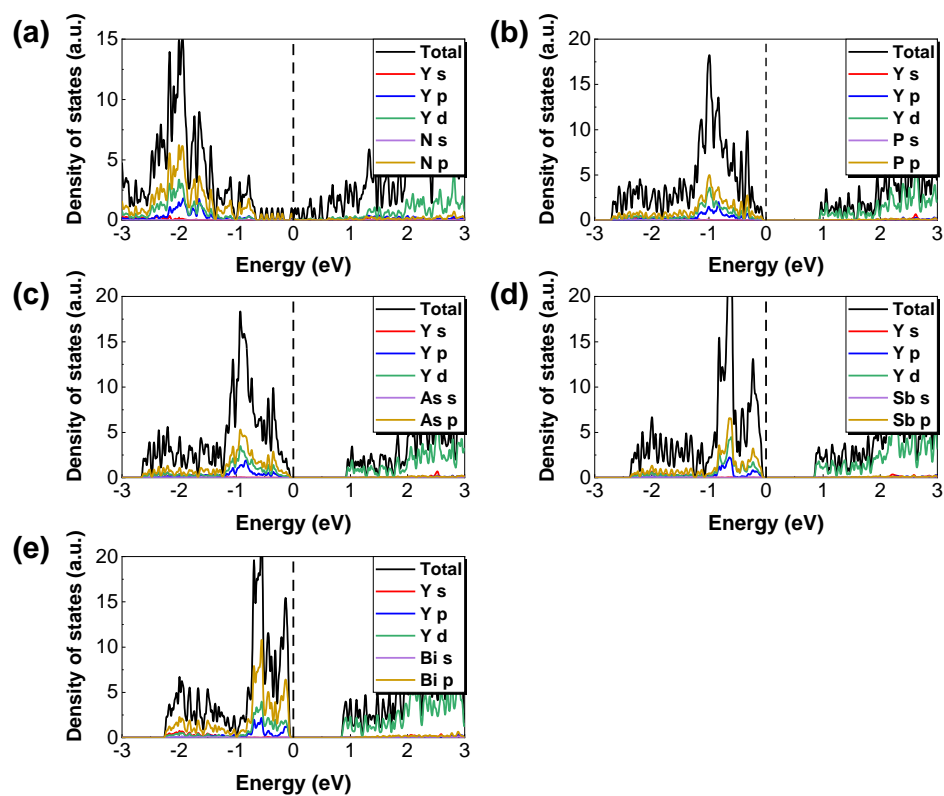

**Figure S27.** Projected density of states of ML YB. (a) YN; (b) YP; (c) YAs; (d) YSb; (e) YBi.

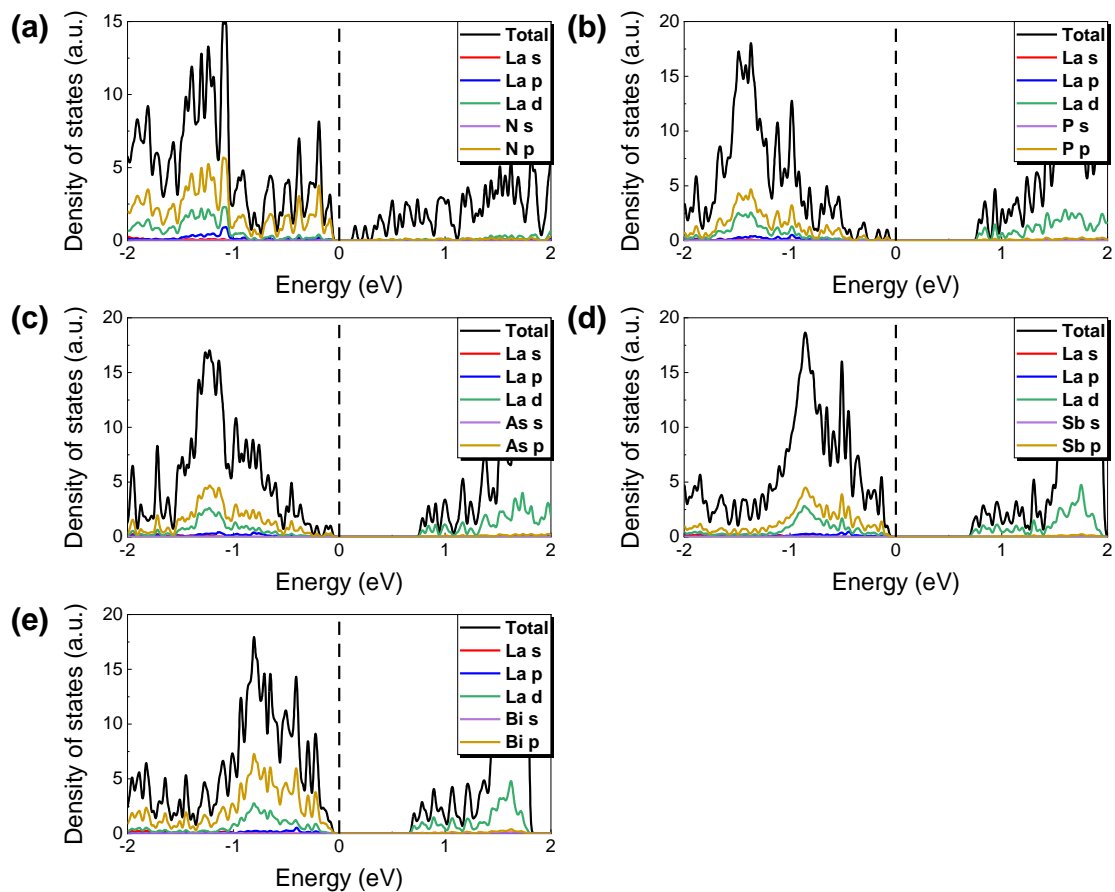

**Figure S28.** Projected density of states of ML LaB. (a) LaN; (b) LaP; (c) LaAs; (d) LaSb; (e) LaBi.

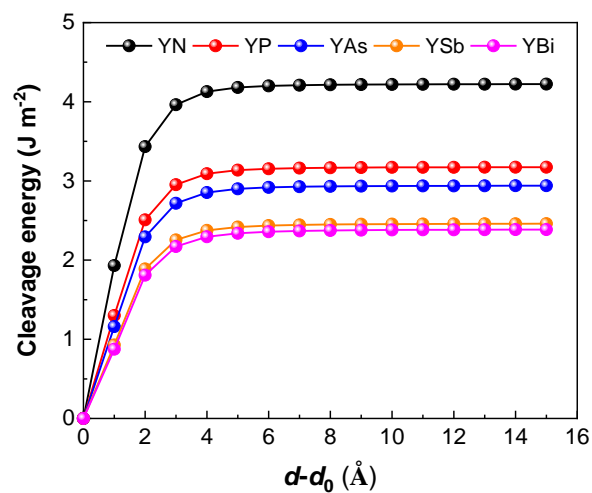

**Figure S29.** The calculated cleavage energies of ML YB ( $B = \text{N, P, As, Sb and Bi}$ ).

The corresponding structure files in the VASP-POSCAR format, of these 14 materials:

**ScN**

```
1.0
4.3127999306      0.0000000000      0.0000000000
0.0000000000      3.7611000538      0.0000000000
0.0000000000      0.0000000000      18.4181003571
Sc  N
2  2
Direct
0.0000000000      0.0000000000      0.523949998
0.5000000000      0.5000000000      0.476050002
0.5000000000      0.0000000000      0.525960015
0.0000000000      0.5000000000      0.474039985
```

**ScP**

```
1.0
4.9967999458      0.0000000000      0.0000000000
0.0000000000      4.5391001701      0.0000000000
0.0000000000      0.0000000000      19.2161998749
Sc  P
2  2
Direct
0.0000000000      0.0000000000      0.515600026
0.5000000000      0.5000000000      0.484399974
0.5000000000      0.0000000000      0.545689984
0.0000000000      0.5000000000      0.454310016
```

**ScAs**

```
1.0
5.0766000748      0.0000000000      0.0000000000
0.0000000000      4.6865000725      0.0000000000
0.0000000000      0.0000000000      19.4174995422
Sc  As
2  2
Direct
0.0000000000      0.0000000000      0.512530006
0.5000000000      0.5000000000      0.487469994
0.5000000000      0.0000000000      0.550729974
0.0000000000      0.5000000000      0.449270026
```

**YN**

1.0

|              |              |               |
|--------------|--------------|---------------|
| 4.6180000305 | 0.0000000000 | 0.0000000000  |
| 0.0000000000 | 3.9820001125 | 0.0000000000  |
| 0.0000000000 | 0.0000000000 | 30.8400001526 |

Y N

2 2

Direct

|             |             |             |
|-------------|-------------|-------------|
| 0.000000000 | 0.000000000 | 0.521120012 |
| 0.500000000 | 0.500000000 | 0.478879988 |
| 0.500000000 | 0.000000000 | 0.512380004 |
| 0.000000000 | 0.500000000 | 0.487619996 |

**YP**

1.0

|                    |                    |                     |
|--------------------|--------------------|---------------------|
| 5.4419598578999997 | 0.0000000000000000 | 0.0000000000000000  |
| 0.0000000000000000 | 4.7492198944000004 | 0.0000000000000000  |
| 0.0000000000000000 | 0.0000000000000000 | 22.0035991668999991 |

Y P

2 2

Direct

|                    |                    |                    |
|--------------------|--------------------|--------------------|
| 0.0000000000000000 | 0.0000000000000000 | 0.5212649699999972 |
| 0.5000000000000000 | 0.5000000000000000 | 0.4787350000000004 |
| 0.5000000000000000 | 0.0000000000000000 | 0.5388529900000023 |
| 0.0000000000000000 | 0.5000000000000000 | 0.4611470099999977 |

**YAs**

1.0

|                    |                    |                     |
|--------------------|--------------------|---------------------|
| 5.5570402144999997 | 0.0000000000000000 | 0.0000000000000000  |
| 0.0000000000000000 | 4.8740000725000003 | 0.0000000000000000  |
| 0.0000000000000000 | 0.0000000000000000 | 22.0035991668999991 |

Y As

2 2

Direct

|                    |                    |                    |
|--------------------|--------------------|--------------------|
| 0.0000000000000000 | 0.0000000000000000 | 0.5200570229999997 |
| 0.5000000000000000 | 0.5000000000000000 | 0.4799430070000028 |
| 0.5000000000000000 | 0.0000000000000000 | 0.5434430239999983 |
| 0.0000000000000000 | 0.5000000000000000 | 0.4565570059999970 |

**YSb**

1.0

|                    |                    |                     |
|--------------------|--------------------|---------------------|
| 5.8130663275071361 | 0.0000000000000000 | 0.0000000000000000  |
| 0.0000000000000000 | 5.1260802381166917 | 0.0000000000000000  |
| 0.0000000000000000 | 0.0000000000000000 | 20.0049495696999990 |

Y Sb

2 2

Direct

|                    |                    |                    |
|--------------------|--------------------|--------------------|
| 0.0000000000000000 | 0.0000000000000000 | 0.5198718064235095 |
| 0.5000000000000000 | 0.5000000000000000 | 0.4801282235764859 |
| 0.5000000000000000 | 0.0000000000000000 | 0.5610252687503774 |
| 0.0000000000000000 | 0.5000000000000000 | 0.4389747612496251 |

**YBi**

1.0

|                    |                    |                     |
|--------------------|--------------------|---------------------|
| 5.8653149118919137 | 0.0000000000000000 | 0.0000000000000000  |
| 0.0000000000000000 | 5.1446326843952006 | 0.0000000000000000  |
| 0.0000000000000000 | 0.0000000000000000 | 20.3881607056000007 |

Y Bi

2 2

Direct

|                    |                    |                    |
|--------------------|--------------------|--------------------|
| 0.5000000000000000 | 0.0000000000000000 | 0.5193660274754777 |
| 0.0000000000000000 | 0.5000000000000000 | 0.4806339613538952 |
| 0.0000000000000000 | 0.0000000000000000 | 0.5669285571855553 |
| 0.5000000000000000 | 0.5000000000000000 | 0.4330714839850742 |

**LaN**

1.0

|              |              |               |
|--------------|--------------|---------------|
| 4.6160001755 | 0.0000000000 | 0.0000000000  |
| 0.0000000000 | 4.1607999802 | 0.0000000000  |
| 0.0000000000 | 0.0000000000 | 21.5841999054 |

La N

2 2

Direct

|             |             |             |
|-------------|-------------|-------------|
| 0.000000000 | 0.000000000 | 0.543349982 |
| 0.500000000 | 0.500000000 | 0.456650018 |
| 0.500000000 | 0.000000000 | 0.508639987 |
| 0.000000000 | 0.500000000 | 0.491360013 |

**LaP**

1.0

|              |              |               |
|--------------|--------------|---------------|
| 5.7955999374 | 0.0000000000 | 0.0000000000  |
| 0.0000000000 | 4.8576002121 | 0.0000000000  |
| 0.0000000000 | 0.0000000000 | 20.2600994110 |

La P

2 2

Direct

|              |              |             |
|--------------|--------------|-------------|
| 0.0000000000 | 0.0000000000 | 0.540050030 |
| 0.5000000000 | 0.5000000000 | 0.459949970 |
| 0.5000000000 | 0.0000000000 | 0.531899967 |
| 0.0000000000 | 0.5000000000 | 0.468100033 |

**LaAs**

1.0

|              |              |               |
|--------------|--------------|---------------|
| 5.9779000282 | 0.0000000000 | 0.0000000000  |
| 0.0000000000 | 4.9925999641 | 0.0000000000  |
| 0.0000000000 | 0.0000000000 | 20.0849990845 |

La As

2 2

Direct

|              |              |             |
|--------------|--------------|-------------|
| 0.0000000000 | 0.0000000000 | 0.538600047 |
| 0.5000000000 | 0.5000000000 | 0.461399953 |
| 0.5000000000 | 0.0000000000 | 0.537230004 |
| 0.0000000000 | 0.5000000000 | 0.462769996 |

**LaSb**

1.0

|              |              |               |
|--------------|--------------|---------------|
| 6.3501000404 | 0.0000000000 | 0.0000000000  |
| 0.0000000000 | 5.3154997826 | 0.0000000000  |
| 0.0000000000 | 0.0000000000 | 19.7266998291 |

La Sb

2 2

Direct

|              |              |             |
|--------------|--------------|-------------|
| 0.0000000000 | 0.0000000000 | 0.536119991 |
| 0.5000000000 | 0.5000000000 | 0.463880009 |
| 0.5000000000 | 0.0000000000 | 0.548870038 |
| 0.0000000000 | 0.5000000000 | 0.451129962 |



## LaBi

1.0

|              |              |               |
|--------------|--------------|---------------|
| 6.4496998787 | 0.0000000000 | 0.0000000000  |
| 0.0000000000 | 5.3614997864 | 0.0000000000  |
| 0.0000000000 | 0.0000000000 | 19.7647991180 |

La Bi

2 2

Direct

|              |              |             |
|--------------|--------------|-------------|
| 0.5000000000 | 0.0000000000 | 0.535769978 |
| 0.0000000000 | 0.5000000000 | 0.464230022 |
| 0.0000000000 | 0.0000000000 | 0.553909998 |
| 0.5000000000 | 0.5000000000 | 0.446090002 |

## References

- [1] J.-H. Yuan, K.-H. Xue, J.-F. Wang and X.-S. Miao, *J. Phys. Chem. Lett.*, 2019, **10**, 4455–4462.
- [2] F. Kang, H. Zhang, L. Wondraczek, X. Yang, Y. Zhang, D. Y. Lei and M. Peng, *Chem. Mater.*, 2016, **28**, 2692–2703.
- [3] H. Jiang, R. I. Gomez-Abal, P. Rinke and M. Scheffler, *Phys. Rev. Lett.*, 2009, **102**, 126403.
